# Supplementary material
Source: Springer Nature journal article supplement (https://www.springermedizin.de/resource/supplementary/13054_2011_9577_MOESM5_ESM.pdf/9706550)

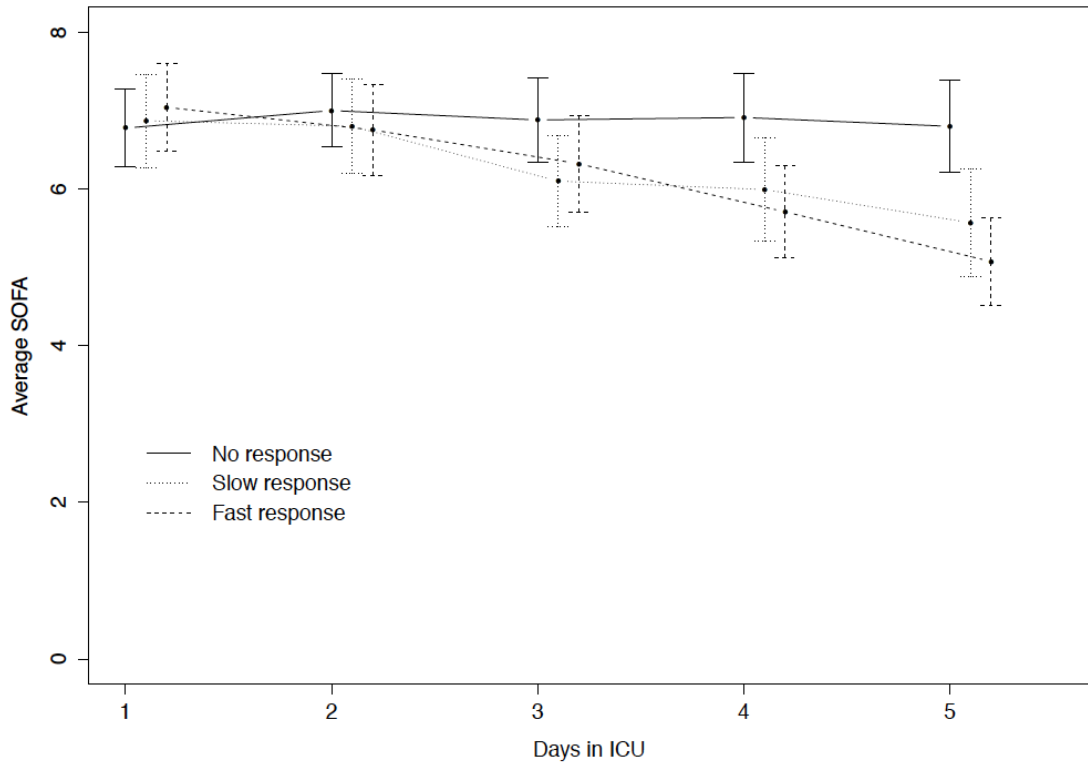

Supplement: MOESM5 [file 9706550]
